# Supplementary material for: Fungal fruit body assemblages are tougher in harsh microclimates
Source: Springer Nature journal article supplement (doi:10.1038/s41598-022-05715-9), 2022-01-31
Supplement: MOESM1 [file 41598_2022_5715_MOESM1_ESM.pdf]

## Fungal fruit body assemblages are tougher in harsh microclimates

### Supplementary Material

#### Supplementary Tables

**Table S1 Species list of the species found in this study with values for the fruit body traits.**

| Phylum     | Species                              | Fruit body width (mm) | Fruit body lightness | Fruit body toughness | Fruit body type |
|------------|--------------------------------------|-----------------------|----------------------|----------------------|-----------------|
| Ascomycota | <i>Ascocoryne cylichnium</i>         | 12.50                 | 0.69                 | soft-fleshed         | Apotecium       |
| Ascomycota | <i>Ascocoryne sarcooides</i>         | 7.50                  | 0.64                 | soft-fleshed         | Apotecium       |
| Ascomycota | <i>Ascocoryne solitaria</i>          | 17.50                 | 0.46                 | soft-fleshed         | Apotecium       |
| Ascomycota | <i>Barbatosphaeria barbirostris</i>  | 0.40                  | 0.57                 | tough-fleshed        | Peritecium      |
| Ascomycota | <i>Bertia moriformis</i>             | 0.75                  | 0.62                 | tough-fleshed        | Peritecium      |
| Ascomycota | <i>Bisporella citrina</i>            | 2.00                  | 0.48                 | soft-fleshed         | Apotecium       |
| Ascomycota | <i>Bisporella pallescens</i>         | 1.25                  | 0.38                 | soft-fleshed         | Apotecium       |
| Ascomycota | <i>Calycina discreta</i>             | 0.80                  | 0.90                 | soft-fleshed         | Apotecium       |
| Ascomycota | <i>Calycina languida</i>             | 0.35                  | 0.89                 | soft-fleshed         | Apotecium       |
| Ascomycota | <i>Chaetosphaeria myriocarpa</i>     | 0.15                  | 0.49                 | tough-fleshed        | Peritecium      |
| Ascomycota | <i>Zignoella ovoidea</i>             | 0.15                  | 0.19                 | tough-fleshed        | Peritecium      |
| Ascomycota | <i>Claussenomyces atrovirens</i>     | 0.40                  | 0.22                 | soft-fleshed         | Apotecium       |
| Ascomycota | <i>Coniochaeta ligniaria</i>         | 0.50                  | 0.10                 | tough-fleshed        | Peritecium      |
| Ascomycota | <i>Coniochaeta malacotricha</i>      | 0.50                  | 0.48                 | tough-fleshed        | Peritecium      |
| Ascomycota | <i>Coniochaeta pulveracea</i>        | 0.50                  | 0.81                 | tough-fleshed        | Peritecium      |
| Ascomycota | <i>Coniochaeta subcorticalis</i>     | 0.50                  | NA                   | tough-fleshed        | Peritecium      |
| Ascomycota | <i>Coniochaeta velutina</i>          | 0.50                  | 0.53                 | tough-fleshed        | Peritecium      |
| Ascomycota | <i>Cosmospora coccinea</i>           | 0.30                  | 0.73                 | tough-fleshed        | Peritecium      |
| Ascomycota | <i>Hypocrea gelatinosa</i>           | 2.00                  | 0.80                 | soft-fleshed         | Apotecium       |
| Ascomycota | <i>Cyathicula cyathoidea</i>         | 1.50                  | 0.55                 | soft-fleshed         | Apotecium       |
| Ascomycota | <i>Exarmidium inclusum</i>           | 0.15                  | 0.23                 | tough-fleshed        | Peritecium      |
| Ascomycota | <i>Haglundia perelegans</i>          | 2.00                  | 0.51                 | soft-fleshed         | Apotecium       |
| Ascomycota | <i>Hamatocanthoscypha laricionis</i> | 0.25                  | 0.42                 | soft-fleshed         | Apotecium       |
| Ascomycota | <i>Helminthosphaeria stuppea</i>     | 0.65                  | 0.18                 | tough-fleshed        | Peritecium      |
| Ascomycota | <i>Hyaloscypha aureliella</i>        | 0.35                  | 0.67                 | soft-fleshed         | Apotecium       |
| Ascomycota | <i>Hymenoscyphus scutula</i>         | 2.75                  | 0.55                 | soft-fleshed         | Apotecium       |
| Ascomycota | <i>Hymenoscyphus virgultorum</i>     | 2.75                  | 0.60                 | soft-fleshed         | Apotecium       |
| Ascomycota | <i>Lachnellula calyciformis</i>      | 2.50                  | 0.83                 | soft-fleshed         | Apotecium       |
| Ascomycota | <i>Lachnum virgineum</i>             | 0.75                  | 0.51                 | soft-fleshed         | Apotecium       |
| Ascomycota | <i>Lasiosphaeria canescens</i>       | 3.00                  | 0.26                 | tough-fleshed        | Peritecium      |
| Ascomycota | <i>Lasiosphaeria hirsuta</i>         | 3.00                  | 0.21                 | tough-fleshed        | Peritecium      |
| Ascomycota | <i>Lasiosphaeria ovina</i>           | 3.00                  | 0.89                 | tough-fleshed        | Peritecium      |
| Ascomycota | <i>Lasiosphaeria spermoides</i>      | 3.00                  | 0.23                 | tough-fleshed        | Peritecium      |
| Ascomycota | <i>Lasiosphaeria strigosa</i>        | 3.00                  | 0.40                 | tough-fleshed        | Peritecium      |
| Ascomycota | <i>Lophiotrema boreale</i>           | 0.70                  | 0.58                 | tough-fleshed        | Peritecium      |
| Ascomycota | <i>Lophium mytilinum</i>             | 0.65                  | 0.84                 | tough-fleshed        | Peritecium      |
| Ascomycota | <i>Melanomma sanguinarium</i>        | 0.40                  | 0.40                 | tough-fleshed        | Peritecium      |
| Ascomycota | <i>Mollisia aquosa</i>               | 0.60                  | 0.91                 | soft-fleshed         | Apotecium       |
| Ascomycota | <i>Mollisia fusca</i>                | 1.10                  | 0.76                 | soft-fleshed         | Apotecium       |
| Ascomycota | <i>Mollisia ligni</i>                | 1.25                  | 0.63                 | soft-fleshed         | Apotecium       |
| Ascomycota | <i>Mollisia olivaceocinerea</i>      | 0.65                  | 0.49                 | soft-fleshed         | Apotecium       |
| Ascomycota | <i>Natantiella ligneola</i>          | 0.40                  | 0.76                 | tough-fleshed        | Peritecium      |
| Ascomycota | <i>Nectria cinnabarina</i>           | 0.25                  | 0.61                 | tough-fleshed        | Peritecium      |
| Ascomycota | <i>Nectria coccinea</i>              | 0.25                  | 0.61                 | tough-fleshed        | Peritecium      |
| Ascomycota | <i>Dialonectria episphaeria</i>      | 0.25                  | 0.50                 | tough-fleshed        | Peritecium      |

|               |                                   |        |      |               |                   |
|---------------|-----------------------------------|--------|------|---------------|-------------------|
| Ascomycota    | <i>Nectria fuckeliana</i>         | 0.25   | 0.46 | tough-fleshed | Perithecium       |
| Ascomycota    | <i>Nectria magnusiana</i>         | 0.30   | 0.59 | tough-fleshed | Perithecium       |
| Ascomycota    | <i>Nectria peziza</i>             | 0.30   | 0.47 | tough-fleshed | Perithecium       |
| Ascomycota    | <i>Ombrophila janthina</i>        | 2.50   | 0.28 | soft-fleshed  | Apotecium         |
| Ascomycota    | <i>Orbilia coccinella</i>         | 0.18   | 0.65 | soft-fleshed  | Apotecium         |
| Ascomycota    | <i>Orbilia delicatula</i>         | 0.75   | 0.30 | soft-fleshed  | Apotecium         |
| Ascomycota    | <i>Patinella sanguineoatra</i>    | 1.00   | 0.22 | tough-fleshed | Apotecium         |
| Ascomycota    | <i>Pezicula acericola</i>         | 1.25   | 0.28 | soft-fleshed  | Apotecium         |
| Ascomycota    | <i>Pezicula cinnamomea</i>        | 0.45   | 0.67 | soft-fleshed  | Apotecium         |
| Ascomycota    | <i>Phaeohelotium carneum</i>      | 0.65   | 0.26 | soft-fleshed  | Apotecium         |
| Ascomycota    | <i>Phaeohelotium trabinellum</i>  | 0.60   | 0.28 | soft-fleshed  | Apotecium         |
| Ascomycota    | <i>Polydesmia pruinosa</i>        | 0.50   | 0.49 | soft-fleshed  | Apotecium         |
| Ascomycota    | <i>Rosellinia aquila</i>          | 1.25   | 0.74 | tough-fleshed | Perithecium       |
| Ascomycota    | <i>Rosellinia thelena</i>         | 1.25   | 0.89 | tough-fleshed | Perithecium       |
| Ascomycota    | <i>Scutellinia cejpui</i>         | 4.50   | 0.66 | soft-fleshed  | Apotecium         |
| Ascomycota    | <i>Scutellinia scutellata</i>     | 4.50   | 0.59 | soft-fleshed  | Apotecium         |
| Ascomycota    | <i>Scutellinia subhirtella</i>    | 5.00   | 0.63 | soft-fleshed  | Apotecium         |
| Ascomycota    | <i>Symbiotaphrina microtheca</i>  | 0.40   | 0.75 | tough-fleshed | Apotecium         |
| Ascomycota    | <i>Tympanis hypopodia</i>         | 0.75   | NA   | soft-fleshed  | Apotecium         |
| Ascomycota    | <i>Tympanis truncatula</i>        | 0.75   | 0.73 | soft-fleshed  | Apotecium         |
| Basidiomycota | <i>Bjerkandera adusta</i>         | 55.00  | 0.84 | tough-fleshed | pileate-sessile   |
| Basidiomycota | <i>Clitocybe ditopa</i>           | 27.50  | 0.53 | soft-fleshed  | pileate-stipitate |
| Basidiomycota | <i>Clitopilus hobsonii</i>        | 8.50   | 0.70 | soft-fleshed  | pileate-stipitate |
| Basidiomycota | <i>Coprinus domesticus</i>        | 25.00  | 0.58 | soft-fleshed  | pileate-stipitate |
| Basidiomycota | <i>Coprinellus micaceus</i>       | 19.00  | 0.61 | soft-fleshed  | pileate-stipitate |
| Basidiomycota | <i>Crepidotus cesatii</i>         | 18.00  | 0.39 | soft-fleshed  | pileate-sessile   |
| Basidiomycota | <i>Crepidotus pallidus</i>        | 1.20   | 0.65 | soft-fleshed  | pileate-sessile   |
| Basidiomycota | <i>Flammulaster carpophilus</i>   | 10.00  | 0.65 | soft-fleshed  | pileate-stipitate |
| Basidiomycota | <i>Gloeophyllum sepiarium</i>     | 72.50  | 0.50 | tough-fleshed | pileate-sessile   |
| Basidiomycota | <i>Gymnopilus sapineus</i>        | 42.50  | 0.56 | soft-fleshed  | pileate-stipitate |
| Basidiomycota | <i>Hohenbuehelia atrocoerulea</i> | 20.00  | 0.34 | soft-fleshed  | pileate-sessile   |
| Basidiomycota | <i>Hohenbuehelia fluxilis</i>     | 11.00  | 0.29 | soft-fleshed  | pileate-sessile   |
| Basidiomycota | <i>Hohenbuehelia pinacearum</i>   | 7.00   | 0.39 | soft-fleshed  | pileate-sessile   |
| Basidiomycota | <i>Hypholoma capnoides</i>        | 40.00  | 0.56 | soft-fleshed  | pileate-stipitate |
| Basidiomycota | <i>Hypholoma fasciculare</i>      | 40.00  | 0.66 | soft-fleshed  | pileate-stipitate |
| Basidiomycota | <i>Hypholoma marginatum</i>       | 30.00  | 0.48 | soft-fleshed  | pileate-stipitate |
| Basidiomycota | <i>Inonotus hastifer</i>          | NA     | 0.62 | tough-fleshed | pileate-sessile   |
| Basidiomycota | <i>Inonotus nodulosus</i>         | 105.00 | 0.73 | tough-fleshed | pileate-sessile   |
| Basidiomycota | <i>Irpex lacteus</i>              | 400.00 | 0.73 | tough-fleshed | pileate-sessile   |
| Basidiomycota | <i>Ischnoderma benzoinum</i>      | 55.00  | 0.64 | tough-fleshed | pileate-sessile   |
| Basidiomycota | <i>Laxitextum bicolor</i>         | 90.00  | 0.36 | tough-fleshed | pileate-sessile   |
| Basidiomycota | <i>Mycena amicta</i>              | 11.50  | 0.67 | soft-fleshed  | pileate-stipitate |
| Basidiomycota | <i>Mycena galopus</i>             | 15.00  | 0.65 | soft-fleshed  | pileate-stipitate |
| Basidiomycota | <i>Oudemansiella mucida</i>       | 60.00  | 0.57 | soft-fleshed  | pileate-stipitate |
| Basidiomycota | <i>Panellus mitis</i>             | 17.50  | 0.65 | soft-fleshed  | pileate-sessile   |
| Basidiomycota | <i>Panellus serotinus</i>         | 65.00  | 0.63 | soft-fleshed  | pileate-sessile   |
| Basidiomycota | <i>Panellus stypticus</i>         | 27.50  | 0.75 | soft-fleshed  | pileate-sessile   |
| Basidiomycota | <i>Panellus violaceofulvus</i>    | 16.50  | 0.57 | soft-fleshed  | pileate-sessile   |
| Basidiomycota | <i>Pholiota cerifera</i>          | 75.00  | 0.80 | soft-fleshed  | pileate-stipitate |
| Basidiomycota | <i>Pholiota lenta</i>             | 75.00  | 0.75 | soft-fleshed  | pileate-stipitate |
| Basidiomycota | <i>Pholiota tuberculosa</i>       | 35.00  | 0.52 | soft-fleshed  | pileate-stipitate |
| Basidiomycota | <i>Pluteus semibulbosus</i>       | 35.00  | 0.56 | soft-fleshed  | pileate-stipitate |
| Basidiomycota | <i>Polyporus brumalis</i>         | 35.00  | 0.75 | tough-fleshed | pileate-stipitate |
| Basidiomycota | <i>Postia caesia</i>              | 40.00  | 0.35 | tough-fleshed | pileate-sessile   |
| Basidiomycota | <i>Postia tephroleuca</i>         | 35.00  | 0.48 | tough-fleshed | pileate-sessile   |
| Basidiomycota | <i>Trametes cinnabarina</i>       | 65.00  | 0.59 | tough-fleshed | pileate-sessile   |

|               |                              |       |      |               |                   |
|---------------|------------------------------|-------|------|---------------|-------------------|
| Basidiomycota | <i>Schizophyllum commune</i> | 20.00 | 0.78 | tough-fleshed | pileate-sessile   |
| Basidiomycota | <i>Simocybe centunculus</i>  | 12.50 | 0.74 | soft-fleshed  | pileate-stipitate |
| Basidiomycota | <i>Trametes gibbosa</i>      | 85.00 | 0.75 | tough-fleshed | pileate-sessile   |
| Basidiomycota | <i>Trametes hirsuta</i>      | 57.50 | 0.76 | tough-fleshed | pileate-sessile   |
| Basidiomycota | <i>Trametes versicolor</i>   | 60.00 | 0.71 | tough-fleshed | pileate-sessile   |
| Basidiomycota | <i>Trichaptum abietinum</i>  | 20.00 | 0.71 | tough-fleshed | pileate-sessile   |

---

**Table S2 Pearson correlation coefficient for the observed community mean of three fruit body traits.**

|               |                         | <b>Fruit<br/>body size</b> | <b>Fruit<br/>body<br/>lightness</b> | <b>Fruit body<br/>toughness</b> | <b>Plot<br/>surface<br/>(all logs)</b> |
|---------------|-------------------------|----------------------------|-------------------------------------|---------------------------------|----------------------------------------|
| Overall       | Fruit body size         | –                          | 0.38                                | 0.25                            | 0.05                                   |
|               | Fruit body lightness    | 0.38                       | –                                   | 0.08                            | -0.06                                  |
|               | Fruit body toughness    | 0.25                       | 0.08                                | –                               | -0.12                                  |
|               | Plot surface (all logs) | 0.05                       | -0.06                               | -0.12                           | –                                      |
| Basidiomycota | Fruit body size         | –                          | 0.18                                | 0.54                            | 0.06                                   |
|               | Fruit body lightness    | 0.18                       | –                                   | 0.45                            | 0.07                                   |
|               | Fruit body toughness    | 0.54                       | 0.45                                | –                               | -0.03                                  |
|               | Plot surface (all logs) | 0.06                       | 0.07                                | -0.03                           | –                                      |
| Ascomycota    | Fruit body size         | –                          | 0.29                                | -0.66                           | 0.11                                   |
|               | Fruit body lightness    | 0.29                       | –                                   | -0.28                           | -0.04                                  |
|               | Fruit body toughness    | -0.66                      | -0.28                               | –                               | -0.06                                  |
|               | Plot surface (all logs) | 0.11                       | -0.04                               | -0.06                           | –                                      |

**Table S3 Generalized linear model (GLM) with canopy as response variable and the three community traits as predictors, allowing to test the hypotheses family in one model.** Residuals were modeled with the binomial family because canopy openness is a binary variable. Significant effects are highlighted in bold. Positive z values correlate with higher community values in the open canopy. Groups were tested using interaction terms with “:” in the GLM.

| Group         | Predictor | Estimate | Std. Error | z value      | Pr(> z )         |
|---------------|-----------|----------|------------|--------------|------------------|
| Overall       | Intercept | -5.45    | 1.02       | <b>-5.37</b> | <b>&lt;0.000</b> |
|               | Size      | 2.51     | 0.48       | <b>5.23</b>  | <b>&lt;0.000</b> |
|               | Lightness | -1.24    | 3.03       | -0.41        | 0.683            |
|               | Toughness | 4.84     | 0.63       | <b>7.65</b>  | <b>&lt;0.000</b> |
| Basidiomycota | Size      | 0.91     | 0.86       | 1.06         | 0.287            |
| Ascomycota    | Size      | -0.66    | 0.90       | -0.74        | 0.460            |
| Basidiomycota | Lightness | 2.65     | 5.22       | 0.51         | 0.612            |
| Ascomycota    | Lightness | -1.75    | 1.84       | -0.95        | 0.342            |
| Basidiomycota | Toughness | 2.23     | 0.62       | <b>3.62</b>  | <b>&lt;0.000</b> |
| Ascomycota    | Toughness | 1.91     | 0.50       | <b>3.84</b>  | <b>&lt;0.000</b> |
| Basidiomycota | Beech     | 2.63     | 1.31       | <b>2.01</b>  | <b>0.045</b>     |
| Ascomycota    | Beech     | -1.48    | 1.43       | -1.04        | 0.298            |
| Basidiomycota | Fir       | 0.57     | 1.20       | 0.48         | 0.633            |
| Ascomycota    | Fir       | -2.94    | 1.64       | -1.80        | 0.072            |
| Basidiomycota | Beech     | 12.83    | 8.68       | 1.48         | 0.139            |
| Ascomycota    | Beech     | -1.02    | 2.49       | -0.41        | 0.682            |
| Basidiomycota | Fir       | -3.76    | 7.05       | -0.53        | 0.593            |
| Ascomycota    | Fir       | -1.39    | 2.33       | -0.60        | 0.552            |
| Basidiomycota | Beech     | 1.78     | 0.89       | <b>2.01</b>  | <b>0.045</b>     |
| Ascomycota    | Beech     | 4.54     | 1.03       | <b>4.42</b>  | <b>&lt;0.000</b> |
| Basidiomycota | Fir       | 3.16     | 1.12       | <b>2.81</b>  | <b>0.005</b>     |
| Ascomycota    | Fir       | 1.58     | 0.60       | <b>2.61</b>  | <b>0.009</b>     |

## Supplementary Figures

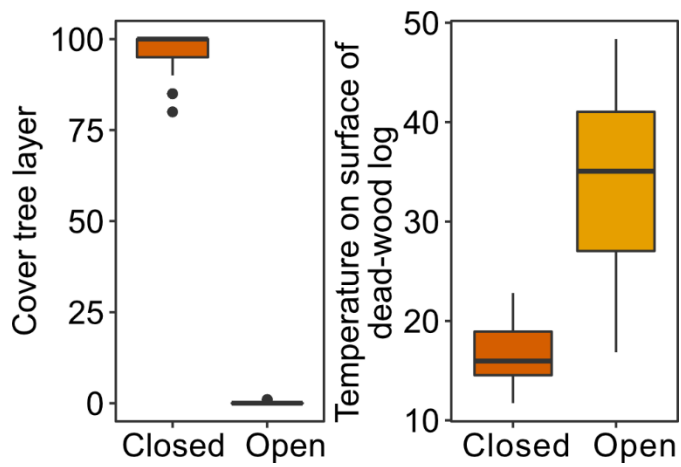

**Figure S1 Demonstration of the microclimatic differences between closed (orange) and open canopies (yellow).** a) Observational cover of the tree layer. b) Temperature measured on the surface of dead-wood logs on the same sunny day on a subset of the logs in the experiment (5 measures per log, 30 logs in open and 30 logs in closed stand).
